# Supplementary material for: Human umbilical cord mesenchymal stem cells attenuate diet-induced obesity and NASH-related fibrosis in mice
Source: PubMed Central journal article supplement — Heliyon. 2024 Feb 1;10(3):e25460. doi: 10.1016/j.heliyon.2024.e25460 (PMC10864966; doi:10.1016/j.heliyon.2024.e25460), 2024-02-01
Supplement: mmc1.pdf [file mmc1.pdf]

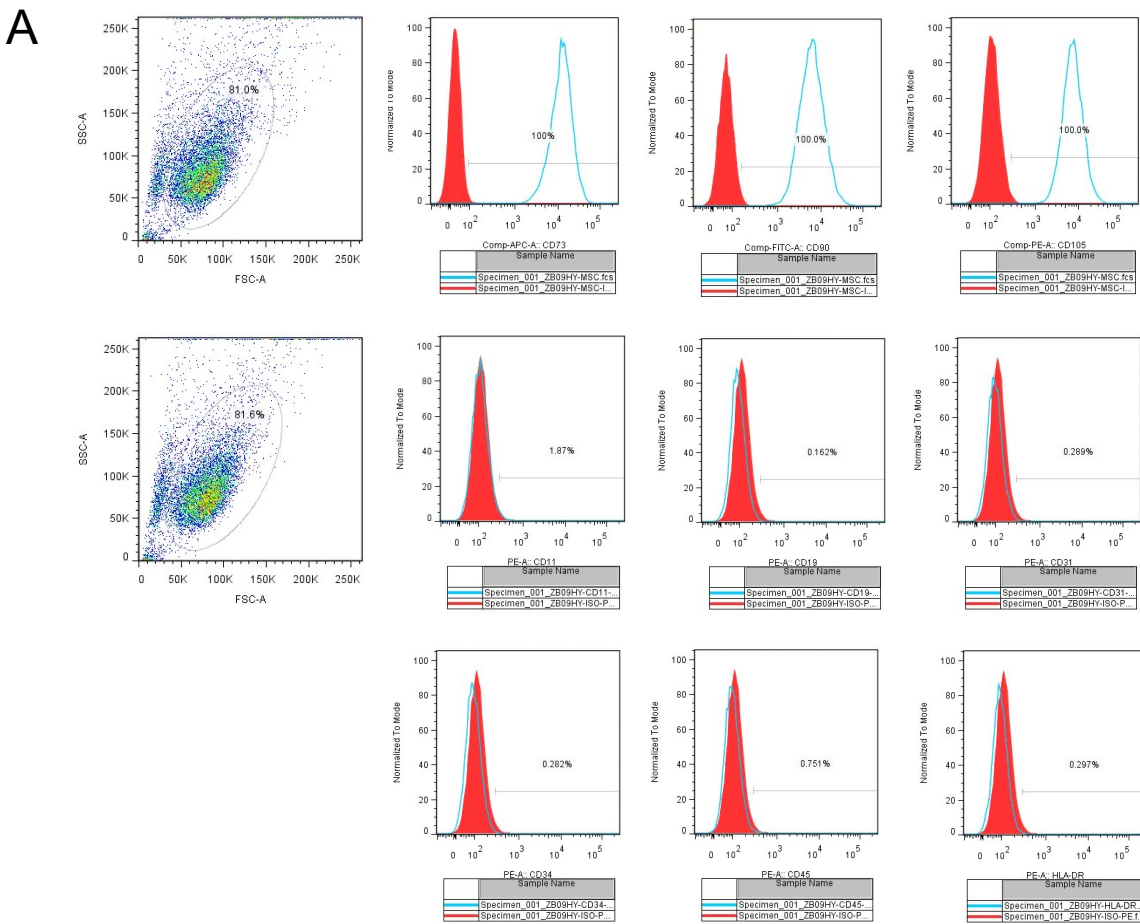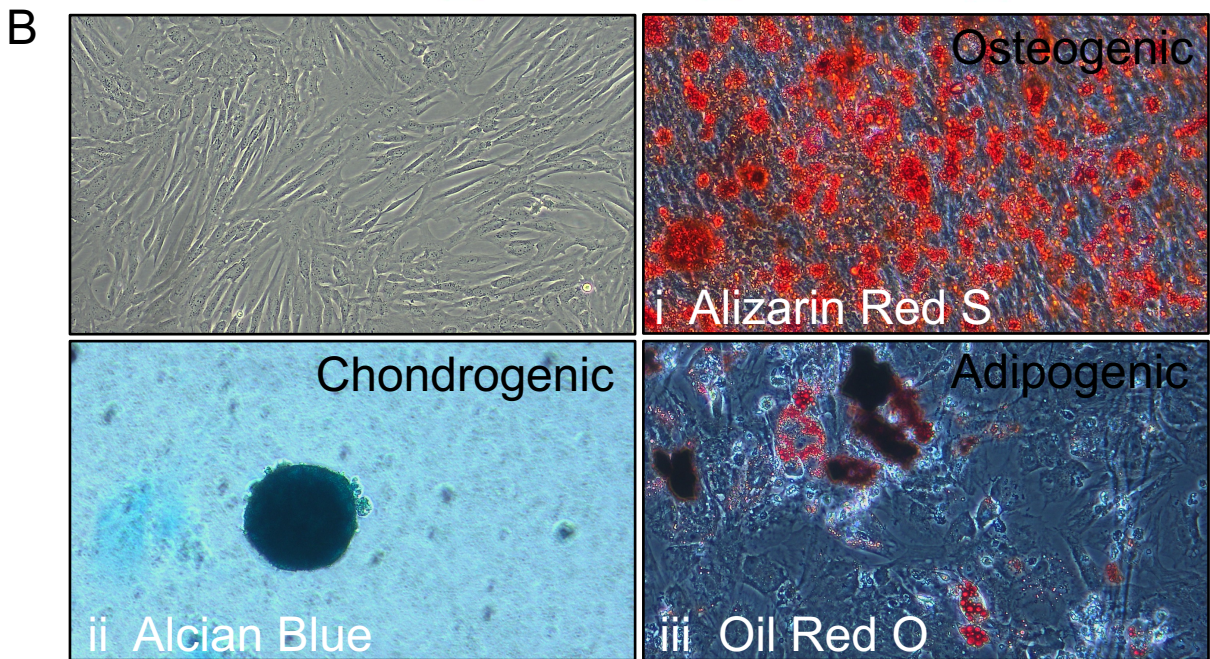

Figure S1. Characteristics of human umbilical cord mesenchymal stem cells (hUC-MSCs).

(A) hUC-MSCs biomarkers, including the positive markers CD73, CD90, and CD105, and the negative markers CD11, CD19, CD31, CD34, CD45, and human leukocyte antigen DR (HLA-DR), were detected by flow cytometry (blue: hUC-MSCs, red: isotype control).

(B) Morphology of hUC-MSCs under light microscope, and (i) Osteogenic(20X), (ii) adipogenic (10X), (iii) chondrogenic(20X) differentiation were assessed by staining the cells with Alizarin Red S, Oil Red O, and Alcian Blue, respectively.

NASH-PBS

NASH-MS

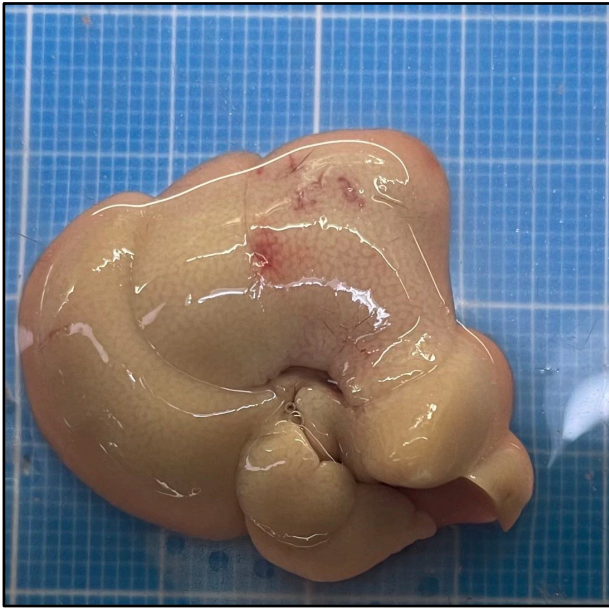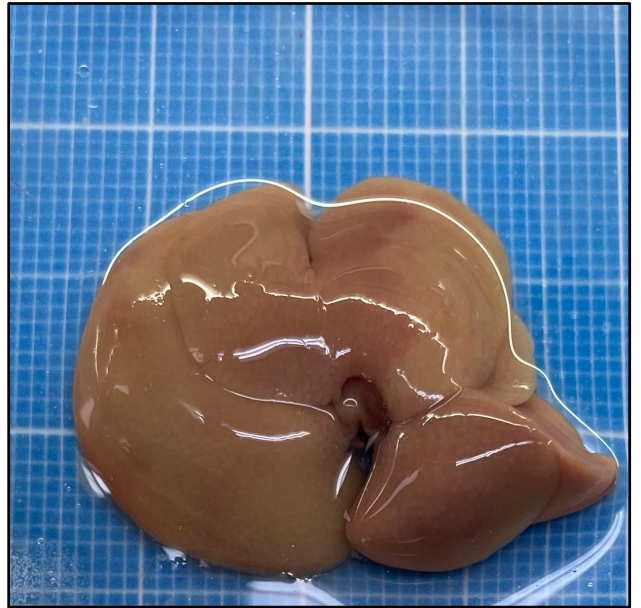

Figure S2. The appearance of the liver difference between the two groups.
