# Supplementary figures and images for: Human umbilical cord mesenchymal stem cells attenuate diet-induced obesity and NASH-related fibrosis in mice
Source: PubMed Central journal article supplement — Heliyon. 2024 Feb 1;10(3):e25460. doi: 10.1016/j.heliyon.2024.e25460 (PMC10864966; doi:10.1016/j.heliyon.2024.e25460), 2024-02-01

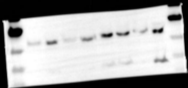

actin (PPAR $\alpha$ )

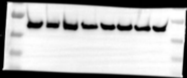

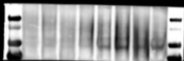

actin (CPT1A)

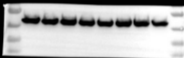

a-SMA

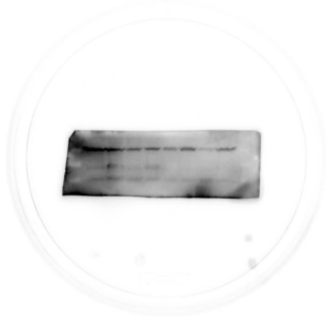

actin( $\alpha$ -SMA)

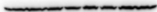

Supplement: mmc2.pdf [file mmc2.pdf]
